# Supplementary material
Source: PubMed Central journal article supplement (PMC3735948)
Supplement: supp_M040055_jlr.M040055-1.pdf [file supp_M040055_jlr.M040055-1.pdf]

## Supplemental Figure 1

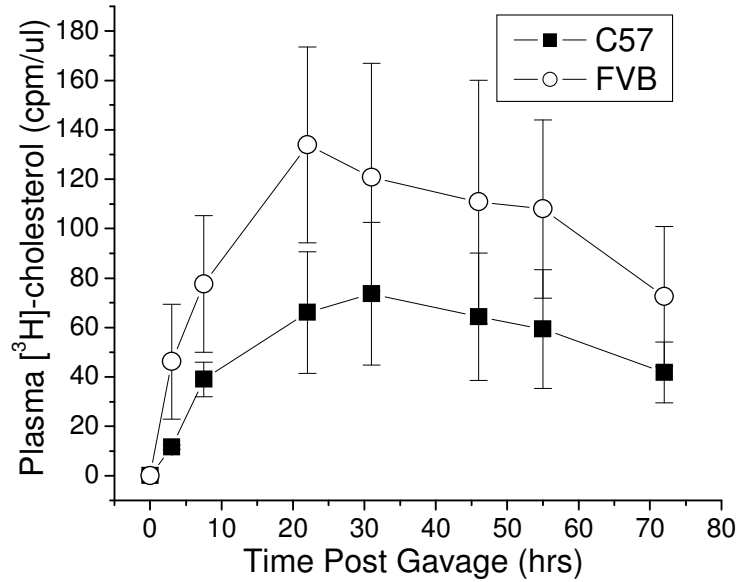

### Figure Legend

**Supplemental Figure 1.** Cholesterol absorption rates in FVB vs C57 mice 72 hours following olive oil gavage. Non-fasted C57 and FVB mice were gavaged with 2  $\mu\text{Ci}$  [ $^3\text{H}$ ]-triolein in 200  $\mu\text{l}$  olive oil. Plasma samples were collected over the course of 72 hours with mice given access to standard chow diet through the duration of the experiment. Plasma [ $^3\text{H}$ ]-cholesterol was measured by liquid scintillation counting. Data represent mean  $\pm$  standard deviation of triplicate mice.
